# Supplementary material
Source: PubMed Central journal article supplement (PMC4264022)
Supplement: jn.114.201343_nutrition201343SupplementaryData2.pdf [file jn.114.201343_nutrition201343SupplementaryData2.pdf]

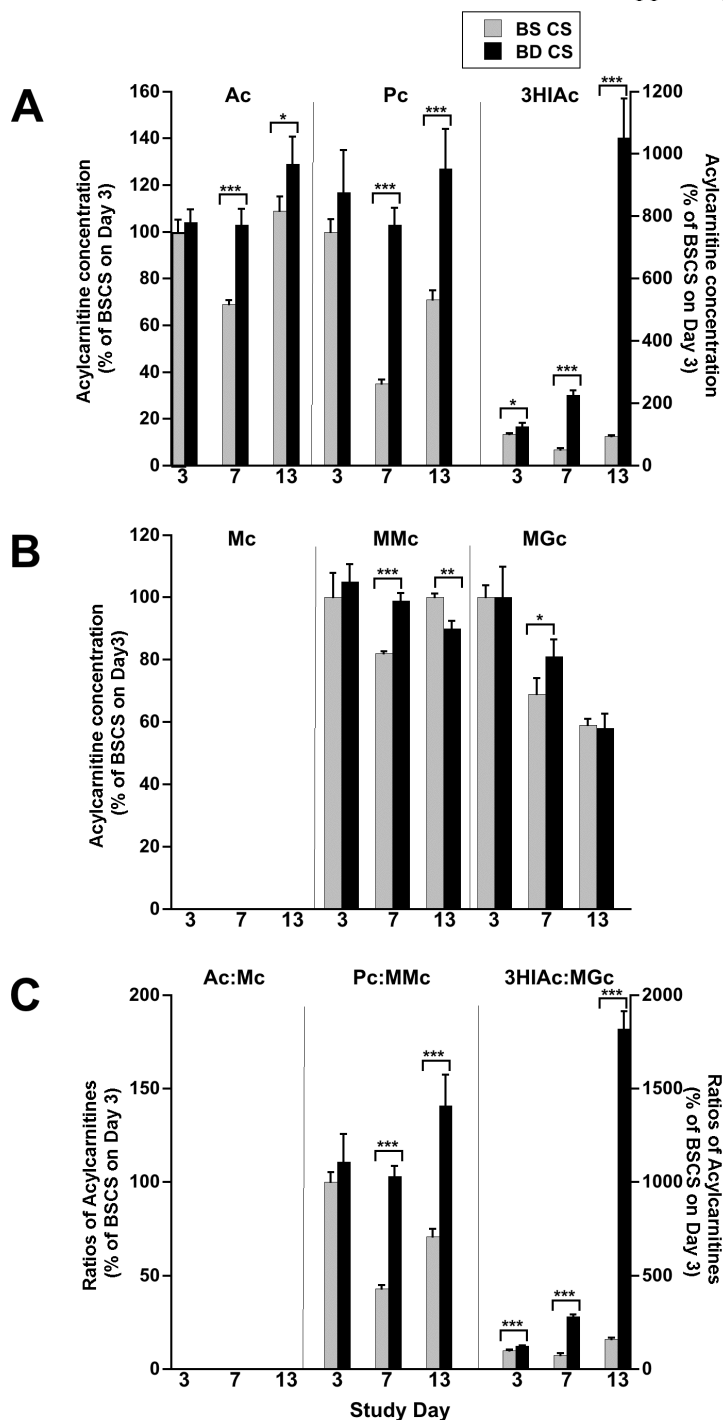

**Supplemental Figure 2.** Metabolic blocks caused by progressive biotin deficiency in HepG2 cells are reflected in changing **extracellular** acylcarnitine concentrations and acylcarnitines ratios. A. Concentration of acylcarnitines arising from the substrate CoAs: Ac, Pc, and 3HIAc. Data for the 3HIAc were plotted against the secondary, right y-axis. B. Concentration of acylcarnitines arising from the products CoAs: Mc, MMc, and MGc. C. Substrate:product ratios of the acylcarnitines - Ac:Mc, Pc:MMc, and 3HIAc:MGc. Data for the 3HIAc:MGc were plotted against the secondary, right y-axis. Results are presented as % increase relative to BS CS cells on day 3. For all three substrate-derived acylcarnitines and the two ratios, two-way ANOVA revealed highly significant interactions ( $P < 0.0001$ ) between biotin status and time. Pair-wise contrasts between BS CS and BD CS cells at each time point revealed a significant effect of biotin status at both day 7 and 13. For product-derived acylcarnitines, interactions were also significant ( $P < 0.01$ ) for MMc and MGc. Pair-wise comparisons between two groups by time point showed significant effect of biotin status at day 7 (MMc and MGc) and day 13 (MMc). Values are means  $\pm$  SDs,  $n = 4$ . \*  $P < 0.05$ , \*\*  $P < 0.001$ , \*\*\*  $P < 0.0001$ . Ac, acetylcarnitine; 3HIAc, 3-hydroxyisovalerylcarnitine; Mc, malonylcarnitine; MGc, 3-methylglutarylcarnitine; MMc, methylmalonylcarnitine; Pc, propionylcarnitine; BD CS, biotin deficient carnitine sufficient; BS CS, biotin sufficient carnitine sufficient.
