# Supplementary material
Source: PubMed Central journal article supplement (PMC4264022)
Supplement: jn.114.201343_nutrition201343SupplementaryData3.pdf [file jn.114.201343_nutrition201343SupplementaryData3.pdf]

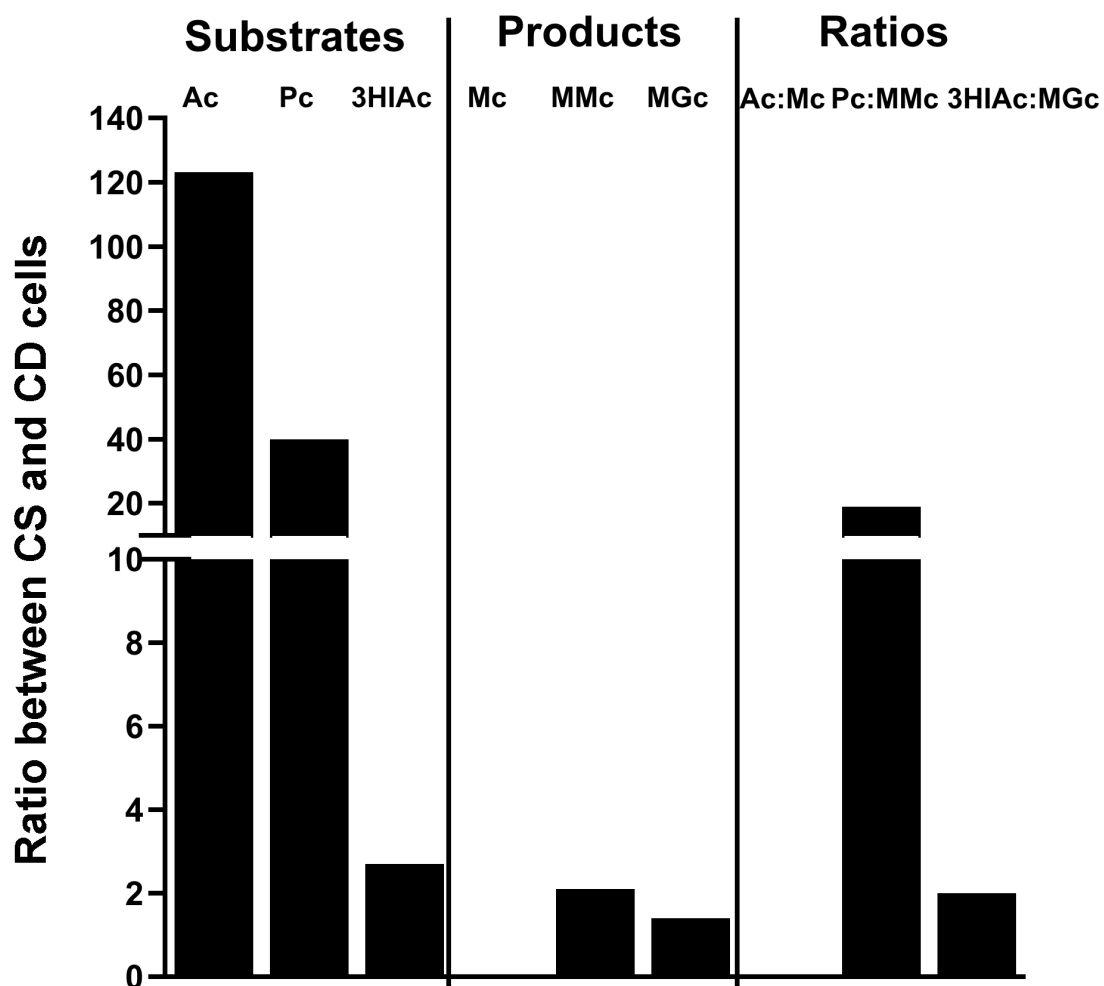

**Supplemental Figure 3.** Effect of carnitine deficiency on acylcarnitines arising from the substrate CoAs, product CoAs, and the ratios. **Extracellular** changes in HepG2 cells are presented as ratios between CS and CD cells. Ac, acetylcarnitine; 3HIAc, 3-hydroxyisovalerylcarnitine; Mc, malonylcarnitine; MGc, 3-methylglutarylcarnitine; MMc, methylmalonylcarnitine; Pc, propionylcarnitine; CS, carnitine sufficient; CD, carnitine deficient.
