# Supplementary material
Source: PubMed Central journal article supplement (PMC4264022)
Supplement: jn.114.201343_nutrition201343SupplementaryData4.pdf [file jn.114.201343_nutrition201343SupplementaryData4.pdf]

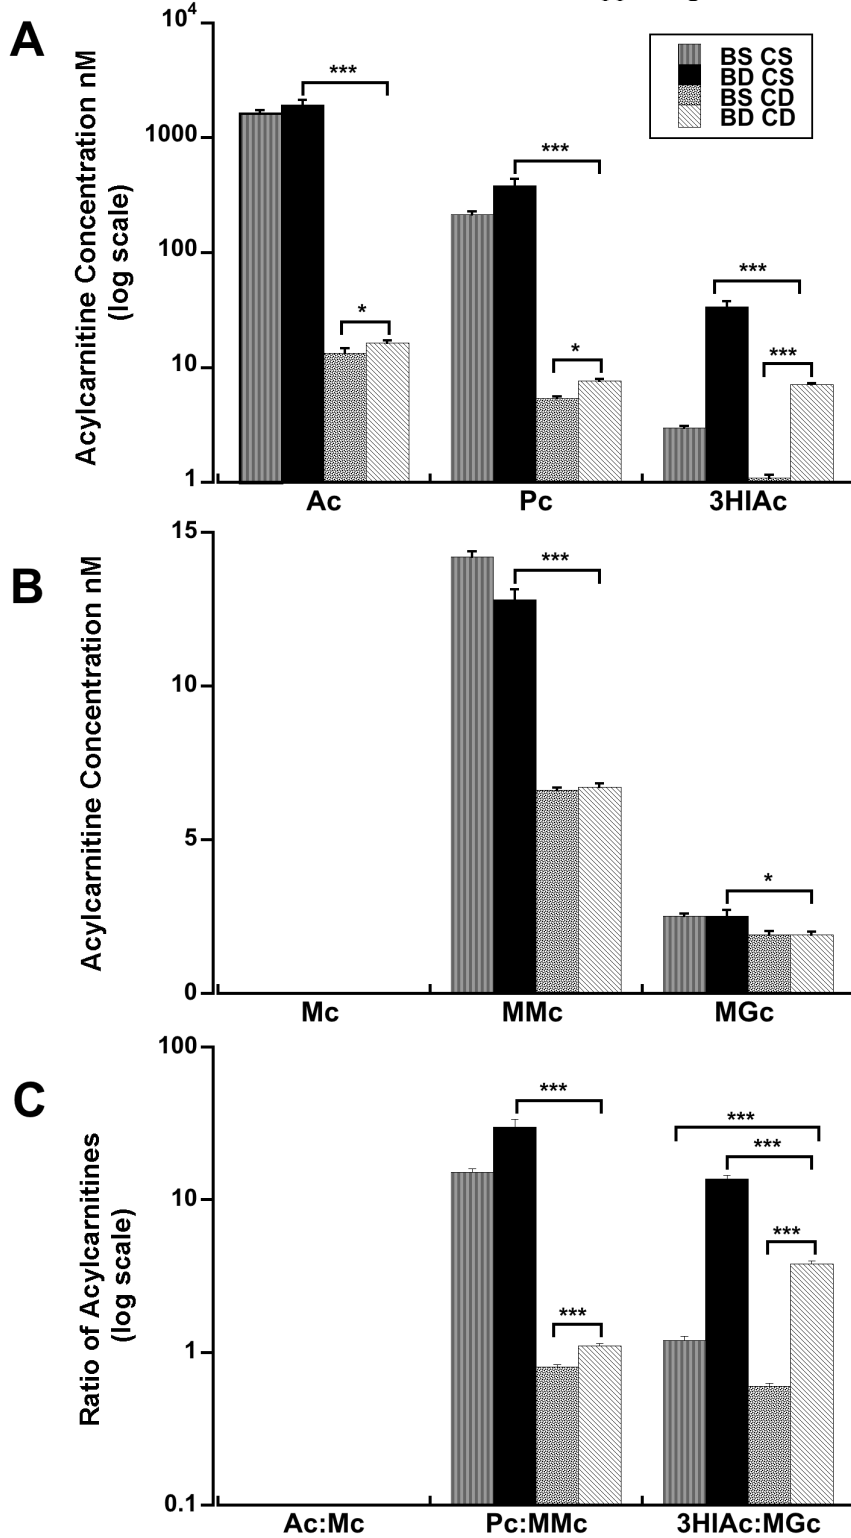

**Supplemental Figure 4.** Effect of combined biotin deficiency and carnitine deficiency on **extracellular** acylcarnitine concentrations and acylcarnitine ratios at the point of greatest depletion of biotin, carnitine, or both in HepG2 cells. A. Acylcarnitines Ac, Pc, and 3HIAc that arise from the acyl-CoAs that are substrates of the biotin-dependent carboxylases. B. Acylcarnitines Mc, MMc, and MGc that arise from the acyl-CoAs that are products of the biotin-dependent carboxylases. C. Substrate:product ratios of the acylcarnitines. Values are mean  $\pm$  SD, n=4. Student's t test: \* P < 0.05, \*\*\* P < 0.001. BD CD, biotin deficient carnitine deficient; BD CS, biotin deficient carnitine sufficient; BS CD, biotin sufficient carnitine deficient; BS CS, biotin sufficient carnitine sufficient; Ac, acetylcarnitine; 3HIAc, 3-hydroxyisovalerylcarnitine; Mc, malonylcarnitine; MGc, 3-methylglutarylcarnitine; MMc, methylmalonylcarnitine; Pc, propionylcarnitine.
