# Supplementary material
Source: PubMed Central journal article supplement (PMC4264022)
Supplement: jn.114.201343_nutrition201343SupplementaryData5.pdf [file jn.114.201343_nutrition201343SupplementaryData5.pdf]

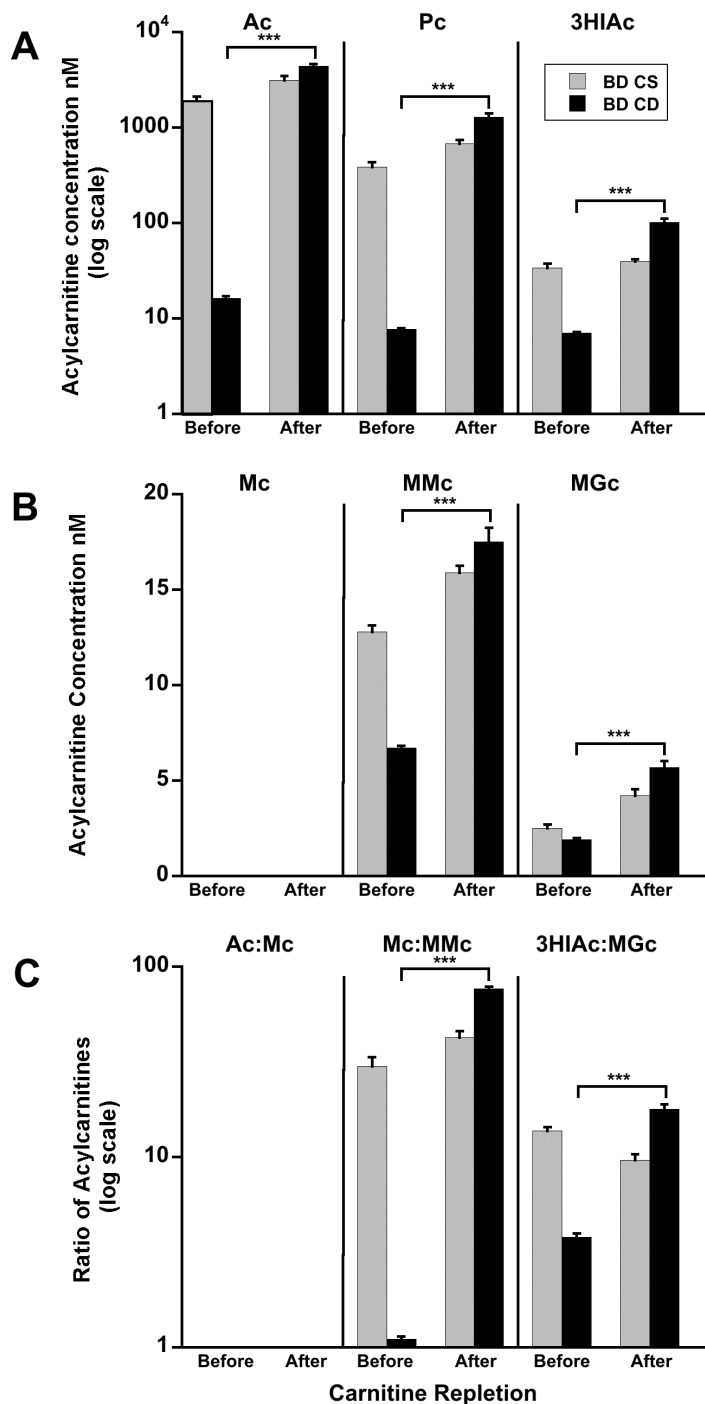

**Supplemental Figure 5.** Effect of carnitine repletion on **extracellular** acylcarnitines and acylcarnitine ratios in HepG2 cells: Before and After 5 days in carnitine sufficient medium. A. Acylcarnitines arising from the substrate CoAs: Ac, Pc, and 3HIAc. B. Acylcarnitines arising from the products CoAs: Mc, MMc, and MGc. C. Substrate:product ratios for Ac:Mc, Pc:MMc, and 3HIAc:MGc. Values are means  $\pm$  SDs,  $n = 4$ . Student's  $t$  test: \*\*\*  $P < 0.0001$ . Ac, acetylcarnitine; 3HIAc, 3-hydroxyisovalerylcarnitine; Mc, malonylcarnitine; MGc, 3-methylglutarylcarnitine; MMc, methylmalonylcarnitine; Pc, propionylcarnitine; BD CD, biotin deficient carnitine deficient; BD CS, biotin deficient carnitine sufficient.
