# Supplementary material
Source: PubMed Central journal article supplement (PMC4264022)
Supplement: jn.114.201343_nutrition201343SupplementaryData6.pdf [file jn.114.201343_nutrition201343SupplementaryData6.pdf]

**Supplemental Table 1.** Intracellular content and extracellular concentration of acylcarnitines arising from the substrate CoAs (Ac, Pc, 3HIAC), product CoAs (Mc, MMC, and MGc) and substrate:product ratios of the acylcarnitines in HepG2 cells cultured in carnitine sufficient or carnitine depleted medium<sup>1</sup>

|                      |           | Cellular Content (pmol/mg protein) <sup>2</sup> |               |
|----------------------|-----------|-------------------------------------------------|---------------|
|                      |           | BS CS                                           | BS CD         |
| <b>Intracellular</b> |           |                                                 |               |
|                      | AC        | 391 ± 32                                        | 3.40 ± 0.55   |
|                      | PC        | 42.0 ± 3.3                                      | 1.10 ± 0.13   |
|                      | 3HIAC     | 3.50 ± 0.31                                     | 0.670 ± 0.049 |
|                      | MC        | 1.40 ± 0.16                                     | 0.170 ± 0.066 |
|                      | MMC       | 73.0 ± 8.0                                      | 5.50 ± 0.77   |
|                      | MGC       | 0.950 ± 0.089                                   | 0.510 ± 0.040 |
|                      | AC:MC     | 284 ± 17                                        | 20.9 ± 5.4    |
|                      | PC:MMC    | 0.589 ± 0.097                                   | 0.212 ± 0.040 |
|                      | 3HIAC:MGC | 3.73 ± 0.19                                     | 1.32 ± 0.13   |
|                      |           | Medium Concentration (pmol/mL)                  |               |
|                      |           | BS CS                                           | BS CD         |
| <b>Extracellular</b> |           |                                                 |               |
|                      | AC        | 1650 ± 92                                       | 13.4 ± 1.3    |
|                      | PC        | 215 ± 12                                        | 5.39 ± 0.22   |
|                      | 3HIAC     | 3.05 ± 0.10                                     | 1.15 ± 0.074  |
|                      | MC        | ND                                              | ND            |
|                      | MMC       | 14.2 ± 0.17                                     | 6.62 ± 0.084  |
|                      | MGC       | 2.54 ± 0.088                                    | 1.88 ± 0.13   |
|                      | AC:MC     | ND                                              | ND            |
|                      | PC:MMC    | 15.1 ± 0.88                                     | 0.815 ± 0.027 |
|                      | 3HIAC:MGC | 1.20 ± 0.069                                    | 0.613 ± 0.033 |

<sup>1</sup> Values are means ± SDs, n = 4

<sup>2</sup> Ratios are unitless

Ac, acetylcarnitine; 3HIAC, 3-hydroxyisovalerylcarnitine; Mc, malonylcarnitine; MGc, 3-methylglutarylcarnitine; MMC, methylmalonylcarnitine; Pc, propionylcarnitine; BS CS, biotin sufficient carnitine sufficient; BS CD, biotin sufficient carnitine deficient.
